# Supplementary material for: Predicting wildlife reservoirs and global vulnerability to zoonotic Flaviviruses
Source: PubMed Central journal article supplement (PMC6303316; doi:10.1038/s41467-018-07896-2), 2018-12-21
Supplement: 41467_2018_7896_MOESM2_ESM.pdf [file 41467_2018_7896_MOESM2_ESM.pdf]

1 **Description of Additional Supplementary Files**

2 File Name: Supplementary Data 1

3 Description: Data showing virus-host associations, citations and GenBank accessions numbers.

4 File Name: Supplementary Data 2

5 Description: The relative importance of variables for different models.

6 File Name: Supplementary Data 3

7 Description: Species predictions generated by all stratified generalized boosted regression models for  
8 virus groups and the labels used for training data.
